# Supplementary material for: Social Inequities in the Impact of COVID-19 Lockdown Measures on the Mental Health of a Large Sample of the Colombian Population (PSY-COVID Study)
Source: MDPI journal article supplement (doi:10.3390/jcm10225297), 2021-11-15
Supplement: s1 [file s1]

**Table S1.** Mental health outcomes for each socio-demographic characteristic.

| <b>Variables</b>                 | <b>Depression (PHQ-2)<br/>(range: 0-6)<br/>M (SD)</b> | <b>Anxiety (GAD-2)<br/>(range: 0-6)<br/>M (SD)</b> | <b>Somatization (SSQ-5)<br/>(range: 0-15)<br/>M (SD)</b> |
|----------------------------------|-------------------------------------------------------|----------------------------------------------------|----------------------------------------------------------|
| <i>Gender</i>                    |                                                       |                                                    |                                                          |
| Female                           | 2.34 (1.60)                                           | 2.08 (1.68)                                        | 3.92 (2.86)                                              |
| Male                             | 2.09 (1.63)                                           | 1.77 (1.63)                                        | 2.77 (2.57)                                              |
| Non-binary                       | 3.15 (1.99)                                           | 2.61 (1.94)                                        | 4.52 (3.77)                                              |
| <i>Age group</i>                 |                                                       |                                                    |                                                          |
| Young adults (18-29 years)       | 2.78 (1.64)                                           | 2.29 (1.77)                                        | 4.29 (3.03)                                              |
| Middle aged adults (30-59 years) | 1.95 (1.49)                                           | 1.82 (1.57)                                        | 3.26 (2.59)                                              |
| Older adults (≥ 60 years)        | 1.48 (1.37)                                           | 1.50 (1.42)                                        | 2.06 (2.14)                                              |
| <i>Income level</i>              |                                                       |                                                    |                                                          |
| Low                              | 2.69 (1.70)                                           | 2.27 (1.80)                                        | 3.98 (3.07)                                              |
| Medium                           | 2.15 (1.54)                                           | 1.92 (1.61)                                        | 3.57 (2.75)                                              |
| High                             | 1.88 (1.54)                                           | 1.76 (1.55)                                        | 3.05 (2.51)                                              |
| <i>Work status</i>               |                                                       |                                                    |                                                          |
| Student                          | 2.69 (1.68)                                           | 2.26 (1.77)                                        | 4.15 (2.99)                                              |
| Informal workers                 | 2.13 (1.56)                                           | 1.93 (1.67)                                        | 3.36 (2.75)                                              |
| Formal workers                   | 2.18 (1.58)                                           | 1.95 (1.63)                                        | 3.60 (2.78)                                              |
| Unpaid workers                   | 2.30 (1.59)                                           | 2.04 (1.70)                                        | 3.43 (2.78)                                              |
| Unemployed                       | 2.25 (1.59)                                           | 1.98 (1.67)                                        | 3.58 (2.84)                                              |
| Retired                          | 1.84 (1.50)                                           | 1.68 (1.53)                                        | 2.63 (2.50)                                              |
| <i>Education level</i>           |                                                       |                                                    |                                                          |
| No studies                       | 2.11 (1.84)                                           | 2.61 (2.28)                                        | 5.33 (4.69)                                              |
| Primary                          | 2.25 (1.74)                                           | 2.06 (1.80)                                        | 3.10 (3.01)                                              |
| Secondary                        | 2.42 (1.71)                                           | 2.14 (1.82)                                        | 3.14 (2.86)                                              |
| University                       | 2.27 (1.60)                                           | 1.99 (1.65)                                        | 3.70 (2.82)                                              |
| <i>Ethnic group</i>              |                                                       |                                                    |                                                          |
| Gypsy                            | 2.19 (1.44)                                           | 1.88 (1.53)                                        | 3.00 (2.13)                                              |
| Afrodescendant                   | 2.35 (1.63)                                           | 2.02 (1.70)                                        | 3.40 (2.90)                                              |
| Indigenous                       | 2.33 (1.70)                                           | 2.08 (1.76)                                        | 3.45 (2.86)                                              |
| None of the above                | 2.27 (1.61)                                           | 2.00 (1.67)                                        | 3.66 (2.83)                                              |
| <i>Area of residence</i>         |                                                       |                                                    |                                                          |
| Urban                            | 2.29 (1.61)                                           | 2.02 (1.68)                                        | 3.67 (2.83)                                              |
| Rural                            | 2.14 (1.56)                                           | 1.87 (1.61)                                        | 3.27 (2.82)                                              |
| <i>Region</i>                    |                                                       |                                                    |                                                          |
| Amazon                           | 2.34 (1.70)                                           | 2.00 (1.66)                                        | 3.89 (3.10)                                              |
| Andean                           | 2.20 (1.56)                                           | 1.97 (1.63)                                        | 3.66 (2.81)                                              |
| Caribbean                        | 2.22 (1.58)                                           | 1.95 (1.66)                                        | 3.66 (2.98)                                              |
| Orinoco                          | 2.32 (1.68)                                           | 2.07 (1.79)                                        | 3.58 (3.00)                                              |
| Pacific                          | 2.40 (1.67)                                           | 2.06 (1.72)                                        | 3.61 (2.82)                                              |

Note. M = Mean, SD = Standard deviation.
